# Supplementary material for: Expression of VEGF Receptors on Endothelial Cells in Mouse Skeletal Muscle
Source: PubMed Central journal article supplement (PMC3440347; doi:10.1371/journal.pone.0044791), 2012-09-12
Supplement: pone.0044791.s002.pdf [file pone.0044791.s002.pdf]

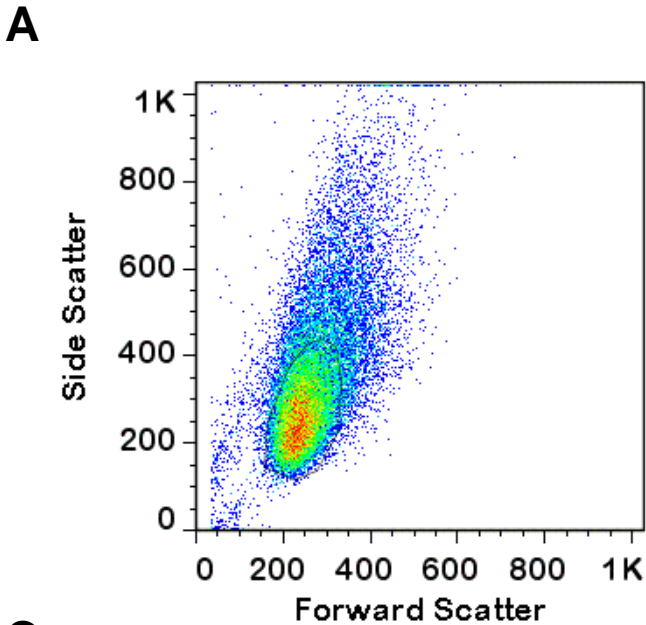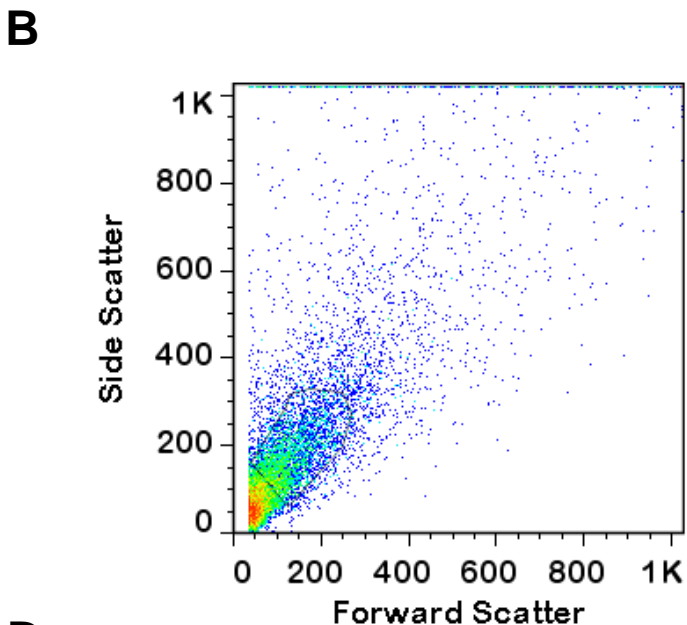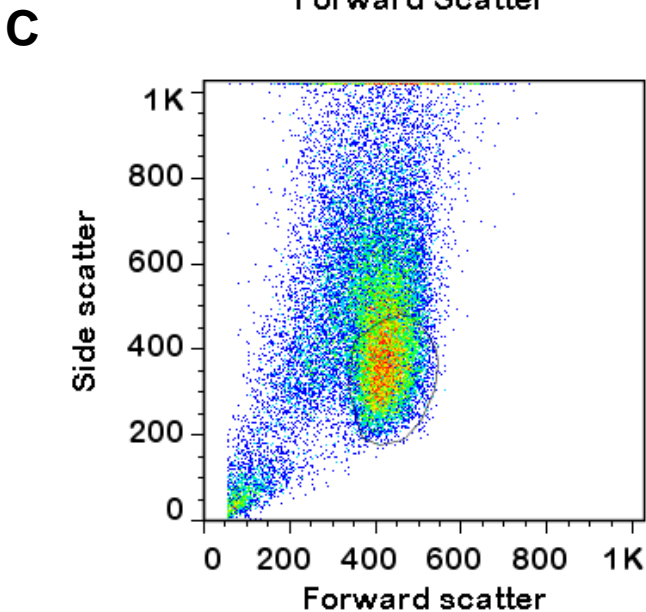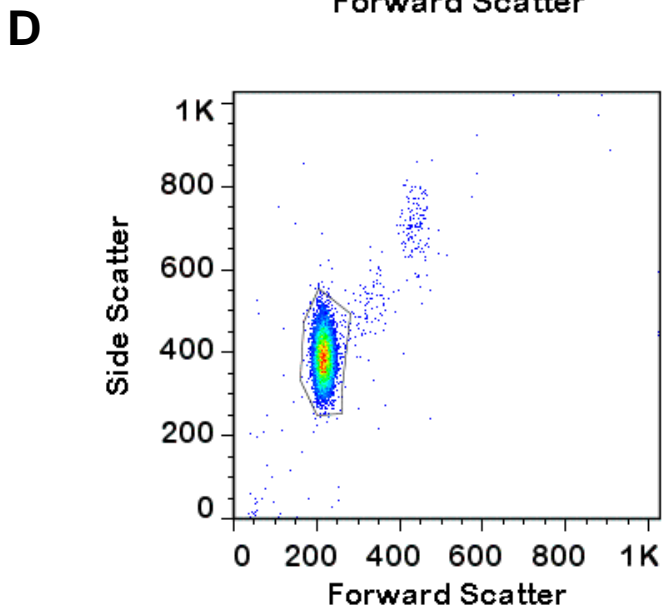

**Figure S2**
